# Supplementary material for: Unprecedented three-dimensional 10-connected bct nets based on trinuclear secondary building units and their magnetic behavior
Source: Royal Society of Chemistry journal article supplement (doi:10.1039/c002366c), 2010-01-01
Supplement: c002366c.pdf [file c002366c.pdf]

*Supporting Information*

**Unprecedented three-dimensional 10-connected bct nets based on trinuclear secondary building units and their magnetic behavior**

**Zhi Su, You Song, Zheng-Shuai Bai, Jian Fan, Guang-Xiang Liu, Wei-Yin Sun\***

Coordination Chemistry Institute, State Key Laboratory of Coordination Chemistry, School of Chemistry and Chemical Engineering, Nanjing National Laboratory of Microstructures, Nanjing University, Nanjing 210093, China,

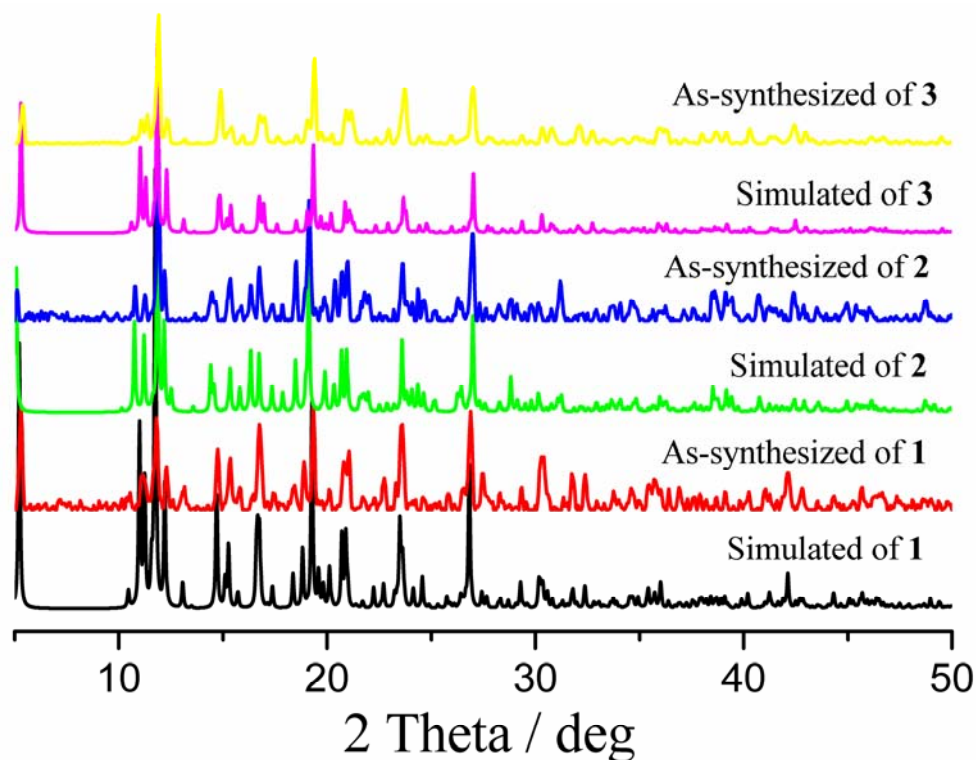

**Figure S1.** The simulated and as-synthesized XRPD patterns of **1 - 3**.

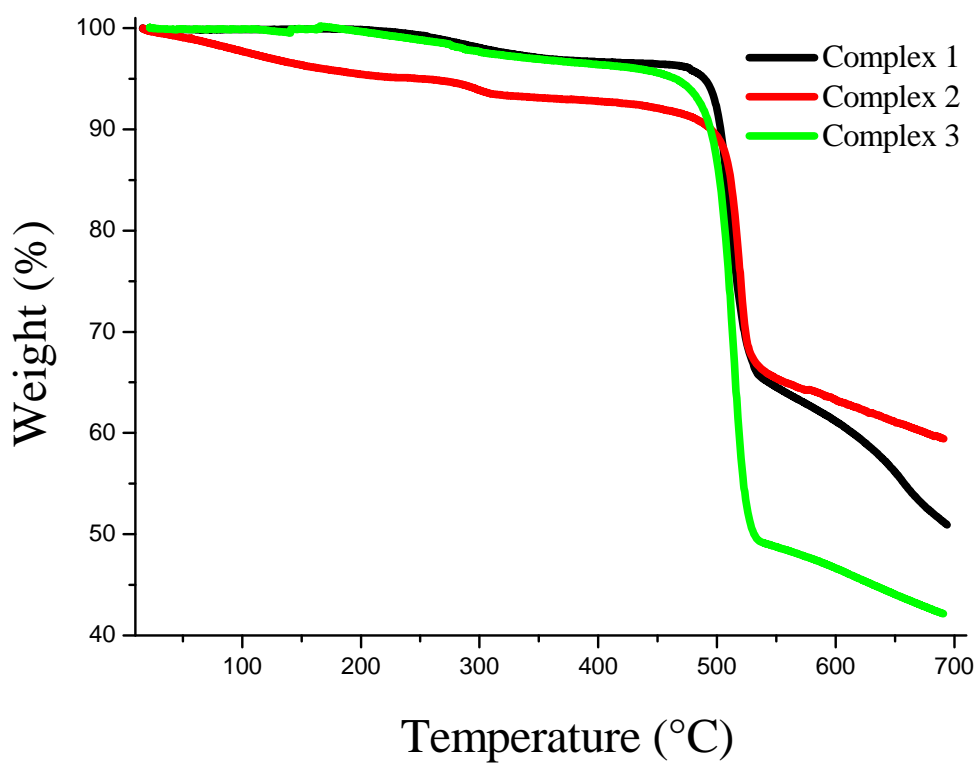

**Figure S2.** The TGA curves of **1 - 3**.

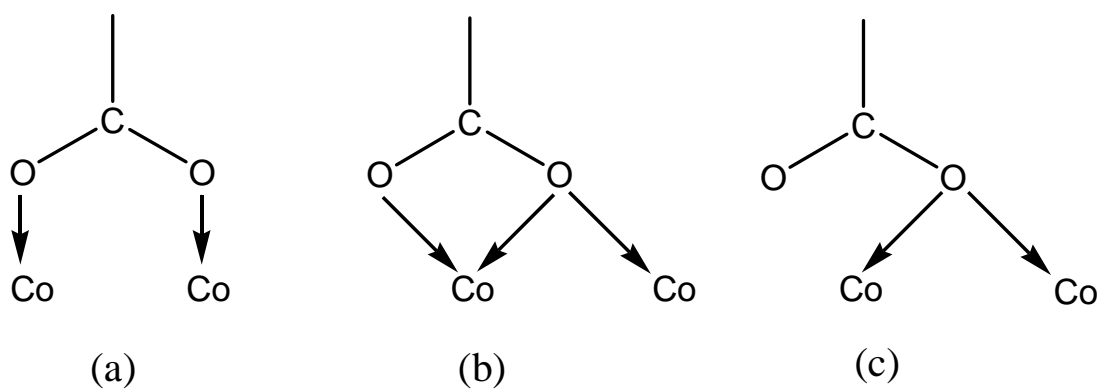

**Figure S3.** Modes of carboxylic groups of  $\text{CTC}^{3-}$  in **1**: Bidentate (a), Chelating/Bridging Bidentate (b) and Bridging Unidentate (c).

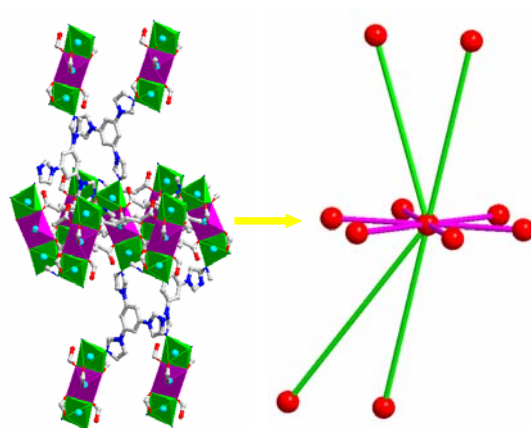

**Figure S4.** Ball-stick and polyhedral (left) and simplified (right) view of the 10-connected node.

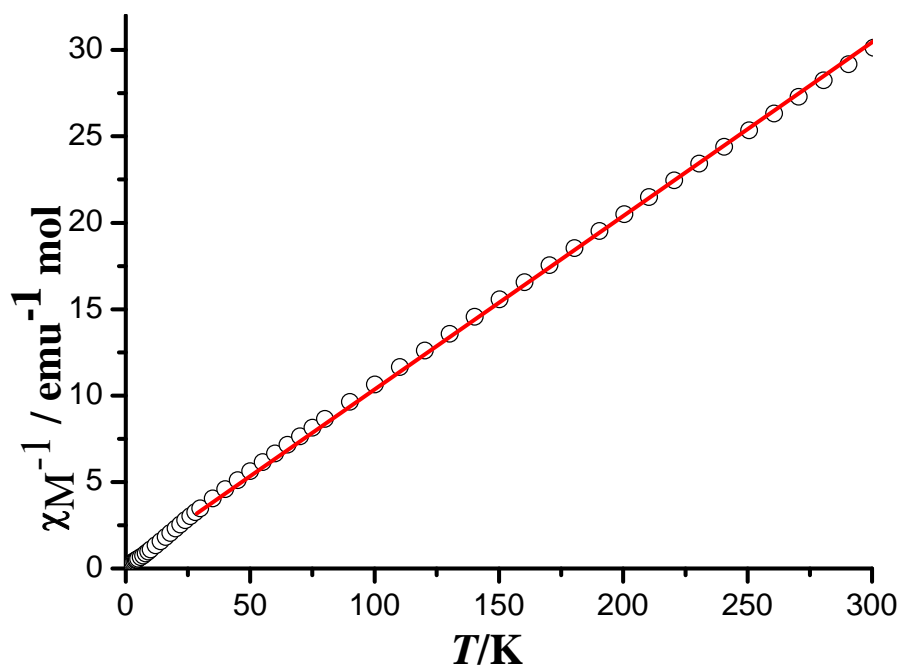

**Figure S5.** Plot of  $\chi_M^{-1}$  vs  $T$  in the range of 1.8-300 K for **1**, the solid line is the linear fitting based on the Curie-Weiss law.

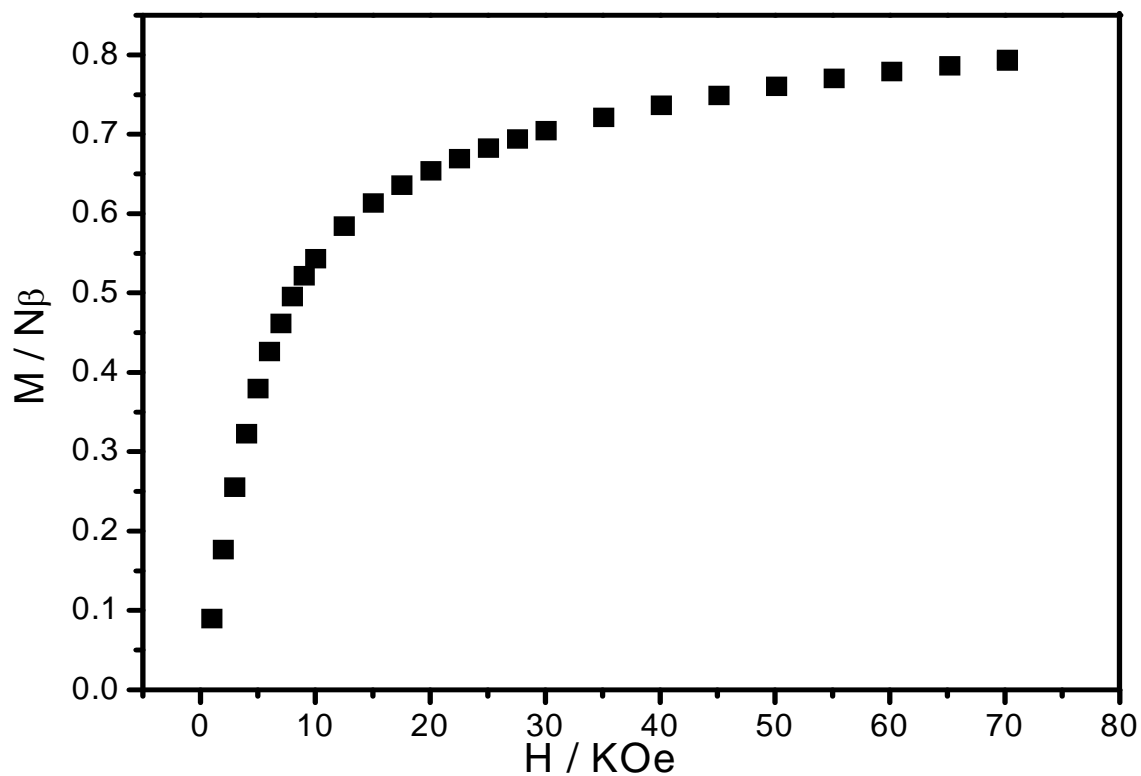

**Figure S6.** The plot of magnetization versus applied magnetic field of **1** at 1.8 K.

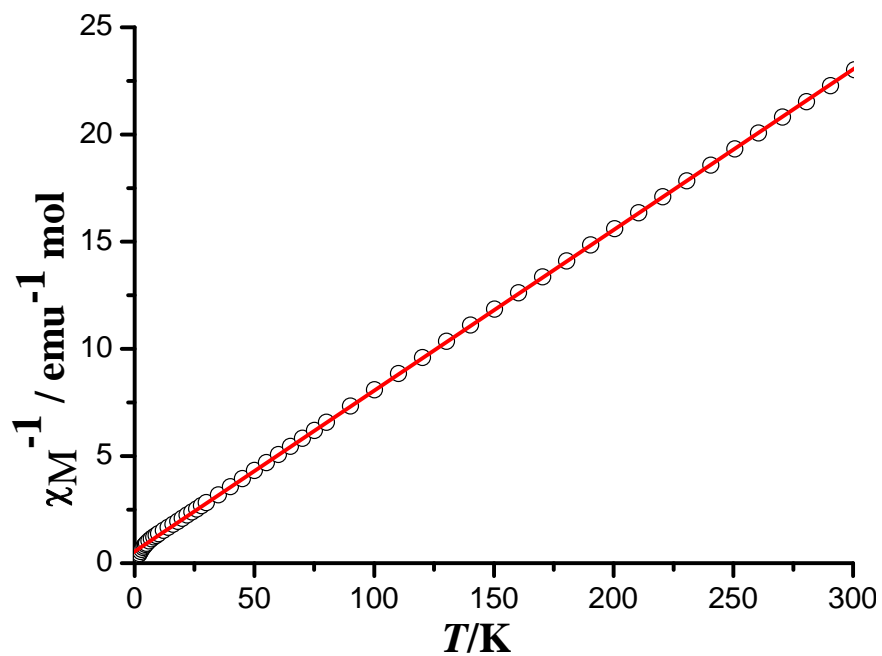

**Figure S7.** Plot of  $\chi_M^{-1}$  vs  $T$  in the range of 1.8-300 K for **2**, the solid line is the linear fitting based on the Curie-Weiss law.

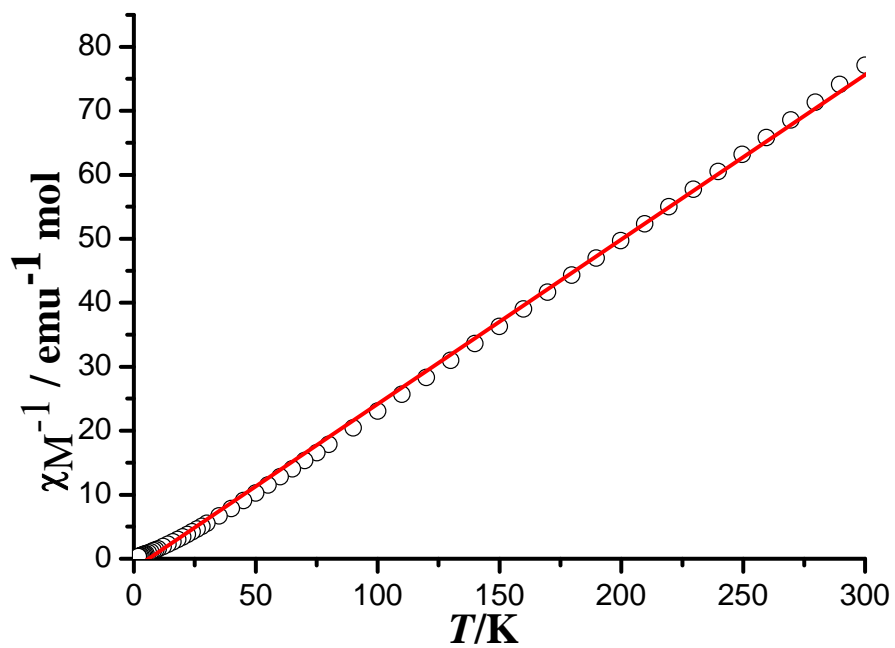

**Figure S8.** Plot of  $\chi_M^{-1}$  vs  $T$  in the range of 1.8-300 K for **3**, the solid line is the linear fitting based on the Curie-Weiss law.

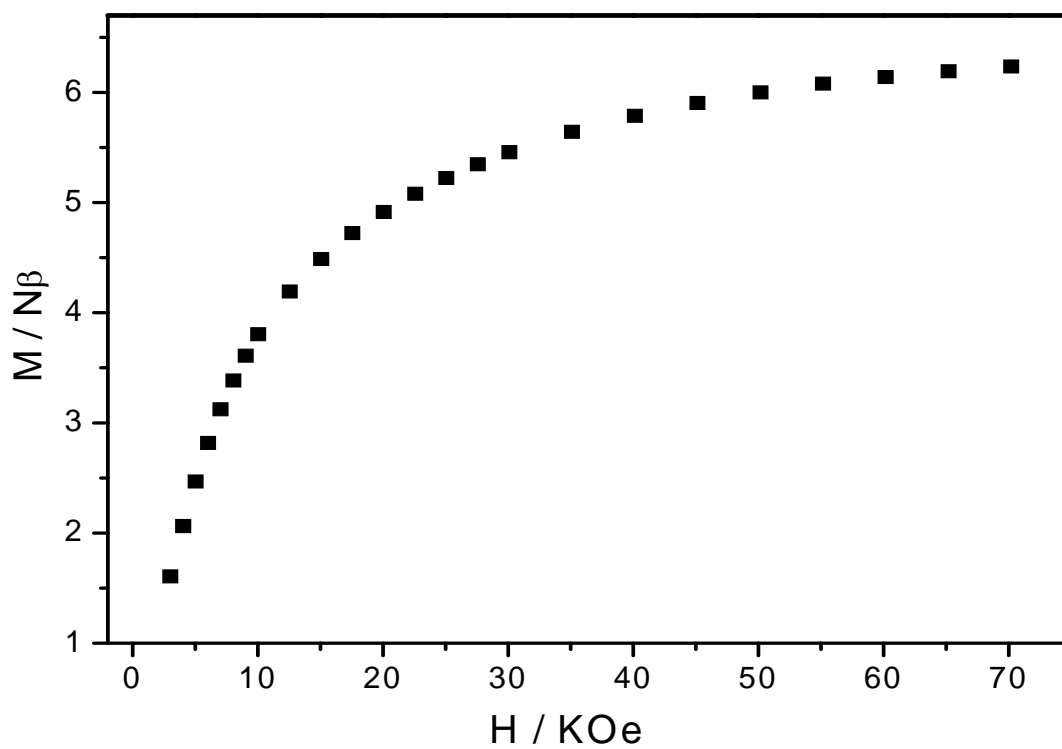

**Figure S9.** The plot of magnetization versus applied magnetic field of **3** at 1.8 K.

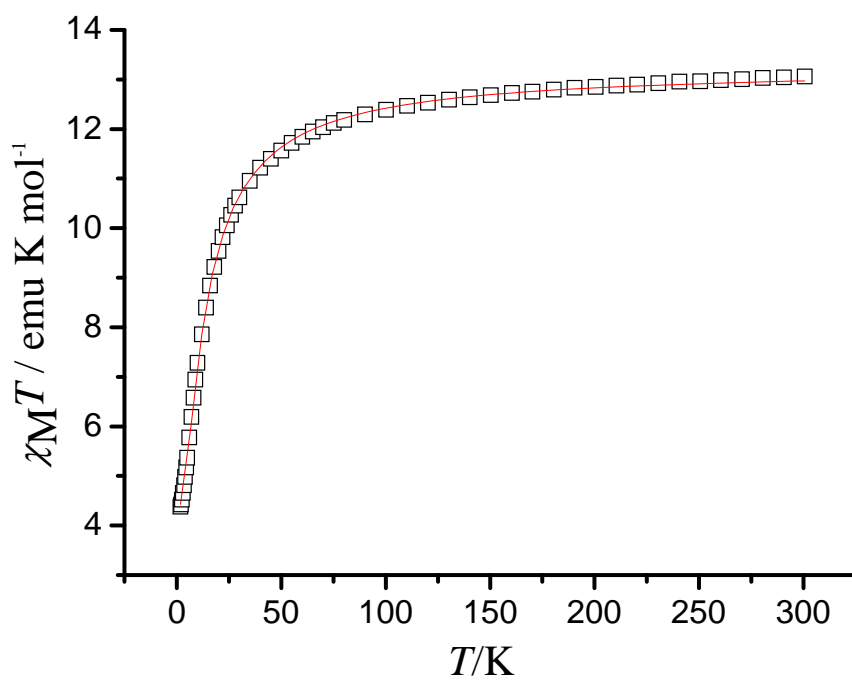

**Figure S10.** The plot of  $\chi_M T$  vs.  $T$  for **2**, where the solid line represents the fitted curve without considering the  $z_j'$  component.

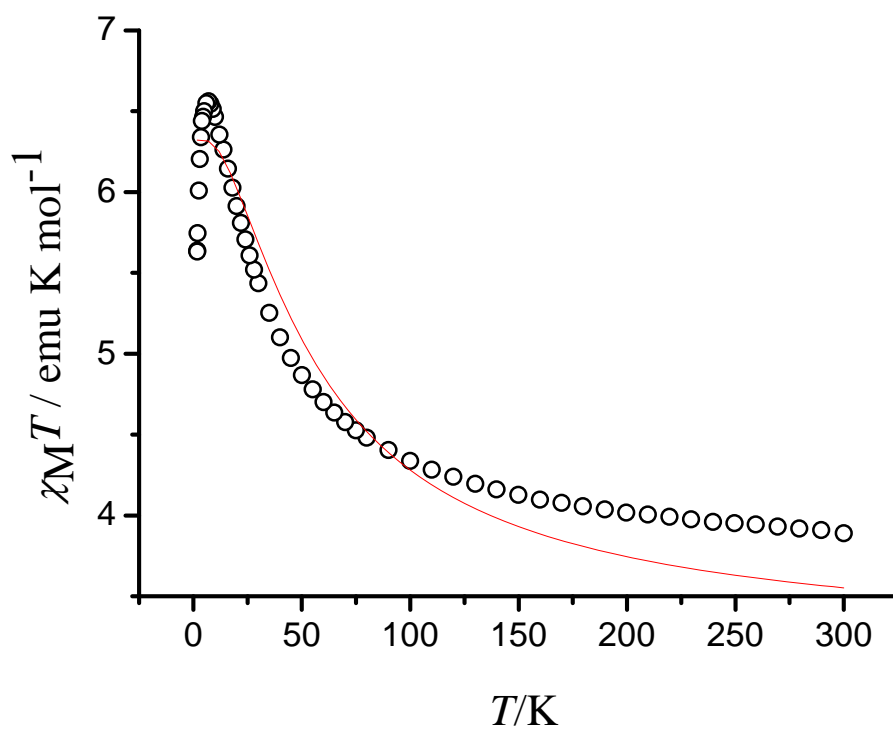

**Figure S11.** The plot of  $\chi_M T$  vs.  $T$  for **3**, where the solid line represents the fitted curve without considering the  $z_j'$  component.

$$\begin{aligned}
A = & 105/2 + 1020 \exp(25J/kT) + 1365/2 \exp(20J/kT) + 429 \exp(15J/kT) \\
& + 930 \exp(10J/kT) + 429 \exp(7J/kT) + 126 \exp(5J/kT) + 495/2 \exp(4J/kT) \\
& + 126 \exp(J/kT) + 105/2 \exp(-2J/kT) + 429 \exp(-3J/kT) + 495/2 \exp(-4J/kT) \\
& + 126 \exp(-5J/kT) + 105/2 \exp(-6J/kT) + 15 \exp(-7J/kT) + 15 \exp(-11J/kT) \\
& + 105/2 \exp(-12J/kT) + 126 \exp(-13J/kT) + 249 \exp(-14J/kT) + 15 \exp(-17J/kT) \\
& + 54 \exp(-20J/kT) + 126 \exp(-23J/kT) + 15 \exp(-25J/kT) + 105/2 \exp(-30J/kT)
\end{aligned}$$

$$\begin{aligned}
B = & 6 + 16 \exp(25J/kT) + 14 \exp(20J/kT) + 12 \exp(15J/kT) + 24 \exp(10J/kT) \\
& + 12 \exp(7J/kT) + 8 \exp(5J/kT) + 10 \exp(4J/kT) + 8 \exp(J/kT) + 6 \exp(-2J/kT) \\
& + 12 \exp(-3J/kT) + 10 \exp(-4J/kT) + 8 \exp(-5J/kT) + 6 \exp(-6J/kT) + 4 \exp(-7J/kT) \\
& + 4 \exp(-11J/kT) + 6 \exp(-12J/kT) + 8 \exp(-13J/kT) + 12 \exp(-14J/kT) + 4 \exp(-17J/kT) \\
& + 8 \exp(-20J/kT) + 8 \exp(-23J/kT) + 4 \exp(-25J/kT) + 6 \exp(-30J/kT)
\end{aligned}$$

**Scheme S1.** The meaning of A and B in equation 5.

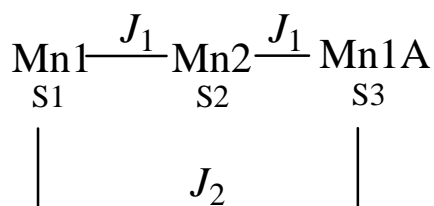

**Scheme S2.** Exchange integrals in trinuclear Mn(II) motif of 2.

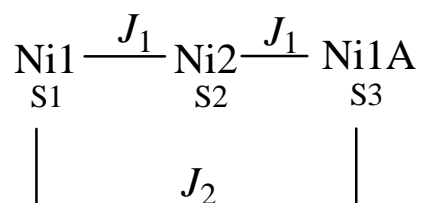

**Scheme S3.** Exchange integrals in trinuclear Ni(II) unit of 3.
